# Supplementary material for: Gas Chromatography–Mass Spectrometry Chemical Profiling of Commiphora myrrha Resin Extracts and Evaluation of Larvicidal, Antioxidant, and Cytotoxic Activities
Source: MDPI journal article supplement (doi:10.3390/molecules29081778), 2024-04-13
Supplement: s1 [file s1]

# Gas Chromatography–Mass Spectrometry Chemical Profiling of *Commiphora myrrha* Resin Extracts and Evaluation of Larvicidal, Antioxidant, and Cytotoxic Activities

Naimah Asid H. Alanazi <sup>1</sup>, Abdullah A. Alamri <sup>2,3</sup>, Abadi M. Mashlawi <sup>4</sup>, Nujud Almuzaini <sup>1</sup>, Gamal Mohamed <sup>5</sup> and Salama A. Salama <sup>4,\*</sup>

<sup>1</sup> Department of Biology, College of Science, University of Hail, Hail 2240, Saudi Arabia; n.alenezy@uoh.edu.sa (N.A.H.A.); n.almuzaini@uoh.edu.sa (N.A.)

<sup>2</sup> Physical Sciences Department, College of Science, Jazan University, Jazan 45142, Saudi Arabia; alamri@jazanu.edu.sa

<sup>3</sup> Nanotechnology Research Unit, College of Science, Jazan University, Jazan 45142, Saudi Arabia

<sup>4</sup> Biology Department, College of Science, Jazan University, Jazan 45142, Saudi Arabia; amashlawi@jazanu.edu.sa

<sup>5</sup> Human Anatomy Department, Faculty of Medicine, Jazan University, Jazan 82817, Saudi Arabia; gmahmed@jazanu.edu.sa

\* Correspondence: sasalama@jazanu.edu.sa; Tel.: +966-540432176

## Supplementary

**Table S1:** Electron Ionization (EI) mass spectra of the detected compounds.

| No. | Compound            | RT <sup>a</sup><br>(min.) |  |
|-----|---------------------|---------------------------|--|
| 1   | $\delta$ -Elemene   | 9.36                      |  |
| 2   | $\alpha$ -Copaene   | 10.12                     |  |
| 3   | $\beta$ -Bourbonene | 10.32                     |  |

|   |                    |       |                                                                                                                                                                                                                                                                                                                                                                               |
|---|--------------------|-------|-------------------------------------------------------------------------------------------------------------------------------------------------------------------------------------------------------------------------------------------------------------------------------------------------------------------------------------------------------------------------------|
| 4 | $\beta$ -Elemene   | 10.68 | 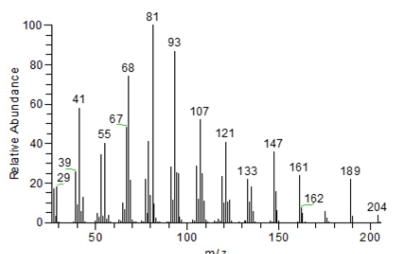 <p>Mass spectrum of <math>\beta</math>-Elemene. The x-axis represents m/z from 50 to 200, and the y-axis represents Relative Abundance from 0 to 100. The base peak is at m/z 81. Other labeled peaks include 39, 41, 55, 67, 68, 93, 107, 121, 133, 147, 161, 189, and 204.</p>           |
| 5 | Caryophyllene      | 11.07 |  <p>Mass spectrum of Caryophyllene. The x-axis represents m/z from 50 to 200, and the y-axis represents Relative Abundance from 0 to 100. The base peak is at m/z 93. Other labeled peaks include 27, 39, 41, 55, 67, 69, 79, 91, 105, 107, 133, 147, 161, 175, 189, and 204.</p>           |
| 6 | $\beta$ -Copaene   | 11.24 |  <p>Mass spectrum of <math>\beta</math>-Copaene. The x-axis represents m/z from 50 to 200, and the y-axis represents Relative Abundance from 0 to 100. The base peak is at m/z 161. Other labeled peaks include 41, 55, 67, 77, 79, 91, 93, 105, 119, 120, 133, 147, 162, 189, and 204.</p> |
| 7 | $\gamma$ -Elemene  | 11.51 |  <p>Mass spectrum of <math>\gamma</math>-Elemene. The x-axis represents m/z from 50 to 200, and the y-axis represents Relative Abundance from 0 to 100. The base peak is at m/z 121. Other labeled peaks include 39, 41, 55, 67, 91, 93, 107, 136, 147, 161, 189, and 204.</p>             |
| 8 | $\alpha$ -Humulene | 11.73 |  <p>Mass spectrum of <math>\alpha</math>-Humulene. The x-axis represents m/z from 50 to 200, and the y-axis represents Relative Abundance from 0 to 100. The base peak is at m/z 93. Other labeled peaks include 41, 53, 67, 79, 80, 91, 107, 121, 122, 147, 148, 162, 189, and 204.</p>  |
| 9 | Germacrene D       | 12.39 |  <p>Mass spectrum of Germacrene D. The x-axis represents m/z from 50 to 200, and the y-axis represents Relative Abundance from 0 to 100. The base peak is at m/z 161. Other labeled peaks include 27, 39, 41, 55, 67, 79, 81, 93, 99, 105, 119, 120, 133, 147, 162, 189, and 204.</p>     |

|    |                     |       |                                                                                                                                                                                                                                                                                                             |
|----|---------------------|-------|-------------------------------------------------------------------------------------------------------------------------------------------------------------------------------------------------------------------------------------------------------------------------------------------------------------|
| 10 | Aromandendrene      | 12.47 | <p>Mass spectrum of Aromandendrene. The x-axis represents m/z from 0 to 200, and the y-axis represents Relative Abundance from 0 to 100. The base peak is at m/z 91. Other labeled peaks include 29, 39, 41, 53, 55, 67, 79, 93, 105, 119, 133, 147, 161, 175, 189, and 204.</p>                            |
| 11 | $\gamma$ -Gurjunene | 12.64 | <p>Mass spectrum of <math>\gamma</math>-Gurjunene. The x-axis represents m/z from 0 to 200, and the y-axis represents Relative Abundance from 0 to 100. The base peak is at m/z 93. Other labeled peaks include 41, 53, 55, 77, 107, 119, 133, 147, 161, 175, 189, and 204.</p>                             |
| 12 | Curzerene           | 13.37 | <p>Mass spectrum of Curzerene. The x-axis represents m/z from 0 to 200, and the y-axis represents Relative Abundance from 0 to 100. The base peak is at m/z 108. Other labeled peaks include 18, 41, 53, 65, 77, 91, 109, 133, 145, 159, 161, 201, and 216.</p>                                             |
| 13 | Cubebol             | 13.45 | <p>Mass spectrum of Cubebol. The x-axis represents m/z from 0 to 200, and the y-axis represents Relative Abundance from 0 to 100. The base peak is at m/z 161. Other labeled peaks include 39, 41, 43, 59, 79, 81, 91, 105, 119, 121, 133, 135, 147, 162, 179, 189, 204, 208, and 222.</p>                  |
| 14 | $\alpha$ -Elemene   | 13.50 | <p>Mass spectrum of <math>\alpha</math>-Elemene. The x-axis represents m/z from 0 to 200, and the y-axis represents Relative Abundance from 0 to 100. The base peak is at m/z 161. Other labeled peaks include 29, 39, 41, 43, 55, 65, 77, 81, 91, 93, 105, 119, 134, 135, 147, 153, 162, 189, and 204.</p> |
| 15 | (+)-Ledene          | 13.64 | <p>Mass spectrum of (+)-Ledene. The x-axis represents m/z from 0 to 200, and the y-axis represents Relative Abundance from 0 to 100. The base peak is at m/z 107. Other labeled peaks include 39, 41, 43, 55, 77, 79, 91, 93, 105, 119, 135, 147, 161, 175, 189, and 204.</p>                               |

|    |                                     |       |  |
|----|-------------------------------------|-------|--|
| 16 | Selina-3,7(11)-diene                | 13.73 |  |
| 17 | Germacrene B                        | 14.07 |  |
| 18 | Furanoedesma-1,4-diene              | 14.44 |  |
| 19 | Furanoedesma-1,3-diene              | 14.98 |  |
| 20 | Lindestrene                         | 15.30 |  |
| 21 | 2-Isopropyl-4,7-Dimethyl-1-Naphthol | 15.82 |  |

|    |                                          |       |                                                                                                                                                                                                                                                                                                         |
|----|------------------------------------------|-------|---------------------------------------------------------------------------------------------------------------------------------------------------------------------------------------------------------------------------------------------------------------------------------------------------------|
| 22 | 1-Methoxy-3,4,5,7-tetramethylnaphthalene | 16.43 | <p>Mass spectrum of 1-Methoxy-3,4,5,7-tetramethylnaphthalene. The x-axis represents m/z from 0 to 250, and the y-axis represents Relative Abundance from 0 to 100. The base peak is at m/z 91. Other labeled peaks include 39, 41, 53, 65, 77, 79, 107, 108, 110, 120, 146, 157, 172, 199, and 214.</p> |
| 23 | Furanoelemene                            | 16.65 | <p>Mass spectrum of Furanoelemene. The x-axis represents m/z from 0 to 250, and the y-axis represents Relative Abundance from 0 to 100. The base peak is at m/z 108. Other labeled peaks include 41, 77, 79, 91, 109, 133, 148, 159, 173, 201, and 216.</p>                                             |
| 24 | Eremophilene                             | 16.80 | <p>Mass spectrum of Eremophilene. The x-axis represents m/z from 0 to 250, and the y-axis represents Relative Abundance from 0 to 100. The base peak is at m/z 107. Other labeled peaks include 27, 39, 41, 55, 77, 79, 93, 119, 133, 135, 161, 162, 175, 189, and 204.</p>                             |
| 25 | Lindera-lactone                          | 17.14 | <p>Mass spectrum of Lindera-lactone. The x-axis represents m/z from 0 to 250, and the y-axis represents Relative Abundance from 0 to 100. The base peak is at m/z 123. Other labeled peaks include 41, 45, 77, 85, 91, 107, 138, 159, 178, 199, 214, 215, and 246.</p>                                  |
| 26 | 2-Methoxyfuranodiene                     | 17.66 | <p>Mass spectrum of 2-Methoxyfuranodiene. The x-axis represents m/z from 0 to 250, and the y-axis represents Relative Abundance from 0 to 100. The base peak is at m/z 123. Other labeled peaks include 41, 45, 77, 85, 91, 107, 138, 159, 178, 199, 214, 215, and 246.</p>                             |
| 27 | $\beta$ -Guaiene                         | 17.99 | <p>Mass spectrum of <math>\beta</math>-Guaiene. The x-axis represents m/z from 0 to 250, and the y-axis represents Relative Abundance from 0 to 100. The base peak is at m/z 161. Other labeled peaks include 39, 41, 43, 55, 77, 81, 91, 93, 105, 119, 133, 147, 162, 175, 189, and 204.</p>           |

|    |                                           |       |  |
|----|-------------------------------------------|-------|--|
| 28 | Cycloisolongifol-5-ol                     | 18.07 |  |
| 29 | $\gamma$ -Eudesmol acetate                | 18.39 |  |
| 30 | Isovalencenol                             | 18.51 |  |
| 31 | 12-Methoxy-19-norpodocarpa-8,11,13-triene | 18.67 |  |
| 32 | Gazaniolide                               | 19.45 |  |
| 33 | Furosardonin A                            | 20.09 |  |

|    |                                                                                                   |       |  |
|----|---------------------------------------------------------------------------------------------------|-------|--|
| 34 | Furosardonin B                                                                                    | 20.63 |  |
| 35 | Bohlmann k2631                                                                                    | 20.86 |  |
| 36 | 6-(3-hydroxyprop-1-en-2-yl)-4,8a-dimethyl-3-oxo-1,2,3,5,6,7,8,8a-octahydronaphthalen-2-yl acetate | 21.01 |  |
| 37 | 4-a-Methyl-1-methylene-1,2,3,4,4a,9,10,10a-octahydrophenanthrene                                  | 21.58 |  |
| 38 | 8,9-Dehydro-9-vinyl- cycloisolongifolene                                                          | 21.82 |  |
| 39 | Reynosin                                                                                          | 22.48 |  |

|    |                                                                         |       |                                                                                      |
|----|-------------------------------------------------------------------------|-------|--------------------------------------------------------------------------------------|
| 40 | beta-Doradecin                                                          | 22.69 | 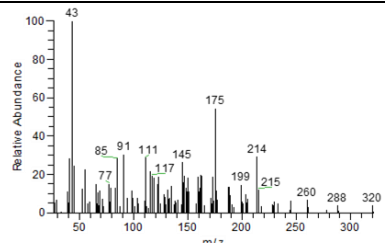   |
| 41 | 3-Ethyl-2,6-naphthlenediol                                              | 17.73 |    |
| 42 | 3-Ethyl-6-(Methoxycarbonyl)-2-Naphthol                                  | 22.30 |    |
| 43 | 9,12(Z,Z)--Octadecadienoic Acid, methyl ester                           | 23.18 |   |
| 44 | 9-Octadecenoic acid, methyl ester                                       | 23.28 |  |
| 45 | Octadecenoic acid, methyl ester                                         | 23.66 |  |
| 46 | (3E,7E,11E)-1-Isopropyl-4,8,12-trimethylcyclo- tetradeca-3,7,11-trienol | 23.83 |  |



|    |                                                                            |       |  |
|----|----------------------------------------------------------------------------|-------|--|
| 47 | Isopropyl-1,5,9-trimethyl-15-oxabicyclo<br>[10.2.1]pentadeca-5,9-dien-2-ol | 24.01 |  |
| 48 | 24-Noroleana-3,12-diene                                                    | 33.97 |  |
| 49 | 24-Norursa-3,12-diene                                                      | 34.21 |  |
| 50 | 24-Norursa-3,12-dien-11-one                                                | 35.46 |  |
